# Supplementary material for: Facile activation of lithium slag for the hydrothermal synthesis of zeolite A with commercial quality and high removal efficiency for the isotope of radioactive 90Sr
Source: Royal Society of Chemistry journal article supplement (doi:10.1039/d1qi01492g), 2021-12-20
Supplement: d1qi01492g1.pdf [file d1qi01492g1.pdf]

## Electronic Supplementary Information

### Facile activation of lithium slag for the hydrothermal synthesis of zeolite A with commercial quality and high removal efficiency for the isotope of radioactive $^{90}\text{Sr}$

Binyu Wang,<sup>a#</sup> Jing Li,<sup>b#</sup> Xue Zhou,<sup>c</sup> Wenfeng Hao,<sup>a</sup> Shaoqing Zhang,<sup>a</sup> Chang Lan,<sup>a</sup> Xiaomei Wang,<sup>a</sup> Ziyu Wang,<sup>a</sup> Jun Xu,<sup>c</sup> Jia-Nan Zhang,<sup>d</sup> Xiaolong Li,<sup>\*e</sup> Wenfu Yan<sup>\*a</sup>

<sup>a</sup> State Key Laboratory of Inorganic Synthesis and Preparative Chemistry, College of Chemistry, Jilin University, Changchun 130012, China. E-mail: yanw@jlu.edu.cn

<sup>b</sup> Research Institute of Jilin Petrochemical Company, PetroChina, Jilin 132001, China.

<sup>c</sup> National Centre for Magnetic Resonance in Wuhan, State Key Laboratory of Magnetic Resonance and Atomic and Molecular Physics, Wuhan Institute of Physics and Mathematics, Chinese Academy of Sciences, Innovation Academy for Precision Measurement Science and Technology, Chinese Academy of Sciences, Wuhan, 430071, China.

<sup>d</sup> College of Materials Science and Engineering, Zhengzhou University, Zhengzhou 450001, China.

<sup>e</sup> Nuclear and Radiation Safety Center of Ministry of Ecology and Environment, Beijing 102488, China. E-mail: free123orange@163.com

# B. W. and L. J. contributed equally to this work.

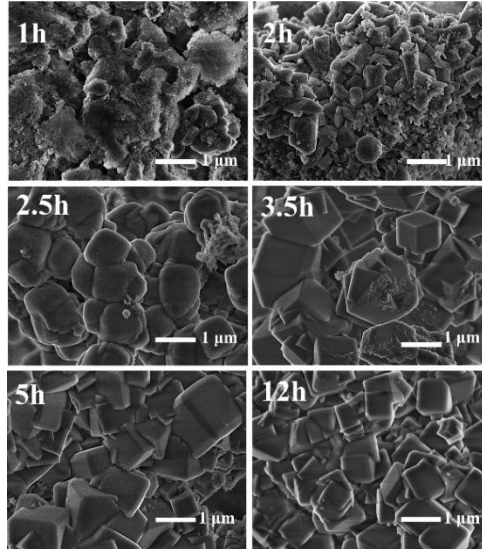

Fig. S1 SEM images of zeolite A with various crystallization times

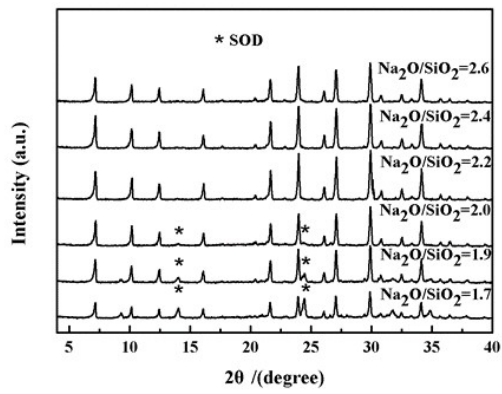

Fig. S2 XRD patterns of zeolite A synthesized with various  $\text{Na}_2\text{O}/\text{SiO}_2$  ratios

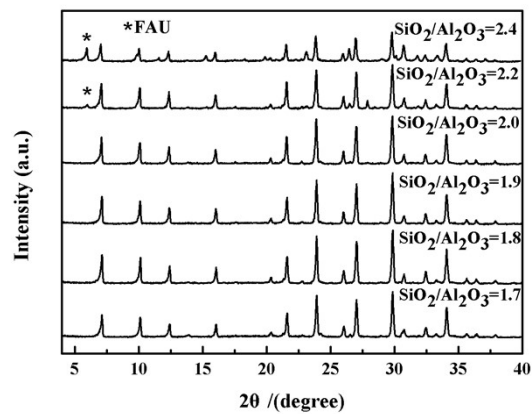

Fig. S3 XRD patterns of zeolite A synthesized with various  $\text{SiO}_2/\text{Al}_2\text{O}_3$  ratios

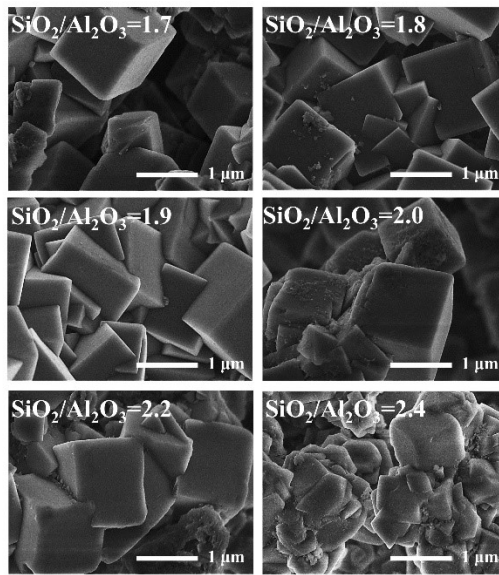

Fig. S4 SEM images of zeolite A synthesized with various  $\text{SiO}_2/\text{Al}_2\text{O}_3$  ratios

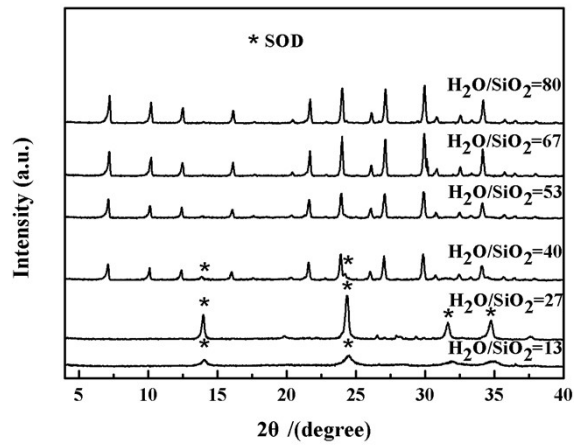

Fig. S5 XRD patterns of zeolite A synthesized with various  $\text{H}_2\text{O}/\text{SiO}_2$  ratios

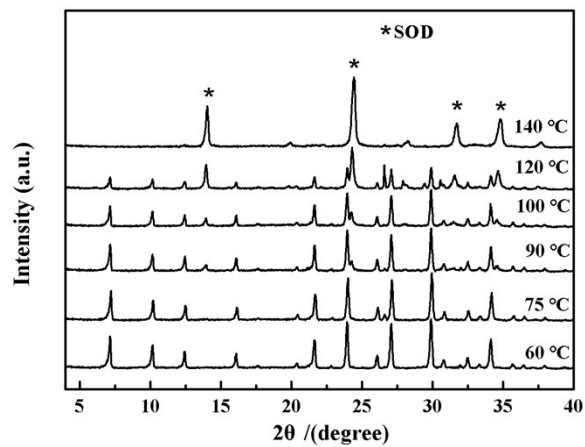

Fig. S6 XRD patterns of zeolite A synthesized with temperatures

**Table S1** Lithium slag composition determined by XRF

| Component                      | wt. % |
|--------------------------------|-------|
| SiO <sub>2</sub>               | 69.42 |
| Al <sub>2</sub> O <sub>3</sub> | 24.99 |
| Fe <sub>2</sub> O <sub>3</sub> | 1.37  |
| K <sub>2</sub> O               | 0.92  |
| CaO                            | 0.89  |
| Na <sub>2</sub> O              | 0.84  |
| MgO                            | 0.58  |
| MnO <sub>2</sub>               | 0.15  |

**Table S2** Kinetic parameters of Sr<sup>2+</sup> sorption on Zeolite A

| Pseudo-first-order model |                                      |                                     | Pseudo-second-order model |                                      |                                                         |
|--------------------------|--------------------------------------|-------------------------------------|---------------------------|--------------------------------------|---------------------------------------------------------|
| R <sup>2</sup>           | Q <sub>e</sub> (mg·g <sup>-1</sup> ) | k <sub>1</sub> (min <sup>-1</sup> ) | R <sup>2</sup>            | Q <sub>e</sub> (mg·g <sup>-1</sup> ) | k <sub>2</sub> (g·mg <sup>-1</sup> ·min <sup>-1</sup> ) |
| 0.902                    | 19.29                                | 0.42                                | 1                         | 115.47                               | 0.034                                                   |

**Table S3** Langmuir and Freundlich isotherm parameters of Sr<sup>2+</sup> sorption on zeolite A synthesized from lithium slag

| Temp. (°C) | Langmuir       |                                        |                         | Freundlich     |      |                                      |
|------------|----------------|----------------------------------------|-------------------------|----------------|------|--------------------------------------|
|            | R <sup>2</sup> | Q <sub>max</sub> (mg·g <sup>-1</sup> ) | b (L·mg <sup>-1</sup> ) | R <sup>2</sup> | n    | k <sub>F</sub> (L·mg <sup>-1</sup> ) |
| 25         | 0.989          | 246.9                                  | 0.395                   | 0.528          | 2.72 | 64.69                                |
